# Supplementary material for: Novel antigen panel for modern broad-spectrum recombinant rotavirus A vaccine
Source: PubMed Central journal article supplement — Clin Exp Vaccine Res. 2021 May 31;10(2):123–31. doi: 10.7774/cevr.2021.10.2.123 (PMC8217573; doi:10.7774/cevr.2021.10.2.123), 2021-05-31
Supplement: cevr-10-123-s001.pdf [file cevr-10-123-s001.pdf]

**Supplemental Material****A. VP8\*-P[4], 159 amino acid (aa) residues**

LDGPYQPTTFKPPNDYWLLISSNTDGVVYESTNNSDFWTAVIAVEPHVSQTNRQYVLFGENKQFNVENSSDKWKF-FEMFKGSSQSDFSNRRTLTSNNRLVGMKYGGRVWTFHGETPRATTDSSNTADLNNISIIHSEFYIIPRSQESKCNEY-INNGL

**B. VP8\*-P[6], 159 aa residues**

LDGPYQPTNFKPPNDYWILLNPTNQVVLLEGTNNTDIWVALLLVEPNVTNQSRQYTLFGEMKQITVENNTNKWKF-FEMFRSNVSAEFQHKRTLTSDTKLAGFMKFYNSVWTFHGETPHATTDYSSTSNLSEVQTVIHVEFYIIPRSQESKCSEY-INTGL

**C. VP8\*-P[8], 159 aa residues**

LDGPYQPTTFTPPTDYWILINSNTNGVVYESTNNSDFWTAVIAVEPHVDPVDRQYNVFGENKQFNVRNDSKWK-FLEMRGSSQNDFYNRRTLTSDTRLVGIKYGGRVWTFHGETPRATTDSSNTANLNGISITIHSEFYIIPRSQESKCNEY-INNGL

**D. VP5\*, 232 aa residues**

AQVNEDIIVSKTSLWKEMQYNRDIIRFKFGNSIVKMGGGLGYKWSEISYKAANYQNYLRDGEQVTAHTTCSVNGVN-NFSYNGGSLPTDFGISRYEVIKENSIVYVDYWDSDSKAFRNMVYVRSALANLNSVKCTGGSYDFSIPVGAWPVMNG-GAVSLHFAGVTLSTQFTDFVSLNSLRFRLTVDPEFSILRTRTVNLYGLPAANPNNGNEYEISGRFSLISLVPTNDD

**Supplement 1.** Consensus amino acid sequences of antigens VP8\* (three genotypes) and VP5\* that were employed for “reverse translation” *in silico* with subsequent cloning of synthetic genes into a vector for expression in *Escherichia coli*. (A) VP8\*-P[4], (B) VP8\*-P[6], (C) VP8\*-P[8], (D) VP5\*.
